# Supplementary material
Source: publisher figshare collection journal article supplement (https://acs.figshare.com/ndownloader/files/4745674)
Supplement: Supplementary file 1 [file 4745674]

 
data_cc 
 
_audit_creation_method            SHELXL-97 
_chemical_name_systematic 
; 
 ? 
; 
_chemical_name_common             ? 
_chemical_melting_point           ? 
_chemical_formula_moiety          ? 
_chemical_formula_sum 
 'C17 H38 Cl N5 W' 
_chemical_formula_weight          531.81 
 
loop_ 
 _atom_type_symbol 
 _atom_type_description 
 _atom_type_scat_dispersion_real 
 _atom_type_scat_dispersion_imag 
 _atom_type_scat_source 
 'C'  'C'   0.0033   0.0016 
 'International Tables Vol C Tables 4.2.6.8 and 6.1.1.4' 
 'H'  'H'   0.0000   0.0000 
 'International Tables Vol C Tables 4.2.6.8 and 6.1.1.4' 
 'Cl'  'Cl'   0.1484   0.1585 
 'International Tables Vol C Tables 4.2.6.8 and 6.1.1.4' 
 'N'  'N'   0.0061   0.0033 
 'International Tables Vol C Tables 4.2.6.8 and 6.1.1.4' 
 'W'  'W'  -0.8490   6.8722 
 'International Tables Vol C Tables 4.2.6.8 and 6.1.1.4' 
 
_symmetry_cell_setting            'monoclinic' 
_symmetry_space_group_name_H-M    'C2/c'  
 
loop_ 
 _symmetry_equiv_pos_as_xyz 
 'x, y, z' 
 '-x, y, -z+1/2' 
 'x+1/2, y+1/2, z' 
 '-x+1/2, y+1/2, -z+1/2' 
 '-x, -y, -z' 
 'x, -y, z-1/2' 
 '-x+1/2, -y+1/2, -z' 
 'x+1/2, -y+1/2, z-1/2' 
 
_cell_length_a                    15.399(2) 
_cell_length_b                    9.5815(15) 
_cell_length_c                    32.617(5) 
_cell_angle_alpha                 90.00 
_cell_angle_beta                  103.140(15) 
_cell_angle_gamma                 90.00 
_cell_volume                      4686.5(12) 
_cell_formula_units_Z             8 
_cell_measurement_temperature     108(2) 
_cell_measurement_reflns_used     1000 
_cell_measurement_theta_min       2.80 
_cell_measurement_theta_max       27.49 
 
_exptl_crystal_description        prism
_exptl_crystal_colour             yellow 
_exptl_crystal_size_max           0.09 
_exptl_crystal_size_mid           0.05 
_exptl_crystal_size_min           0.02 
_exptl_crystal_density_meas       ? 
_exptl_crystal_density_diffrn     1.507 
_exptl_crystal_density_method     'not measured' 
_exptl_crystal_F_000              2127 
_exptl_absorpt_coefficient_mu     5.052 
_exptl_absorpt_correction_type    empirical 
_exptl_absorpt_correction_T_min   0.468 
_exptl_absorpt_correction_T_max   0.752 
_exptl_absorpt_process_details    sadabs 
 
_exptl_special_details 
; 
 ? 
; 
 
_diffrn_ambient_temperature       108(2) 
_diffrn_radiation_wavelength      0.71073 
_diffrn_radiation_type            MoK\a 
_diffrn_radiation_source          'Enhance (Mo) X-ray Source'
_diffrn_radiation_monochromator   graphite 
_diffrn_measurement_device_type   'Sapphire2-CCD, Oxford Diffraction' 
_diffrn_measurement_method        '1258 images at 1.0 deg. in \w and 20 sec.' 
_diffrn_detector_area_resol_mean  ? 
_diffrn_standards_number          ? 
_diffrn_standards_interval_count  ? 
_diffrn_standards_interval_time   ? 
_diffrn_standards_decay_%         ? 
_diffrn_reflns_number             25882 
_diffrn_reflns_av_R_equivalents   0.1318 
_diffrn_reflns_av_sigmaI/netI     0.2176 
_diffrn_reflns_limit_h_min        -19 
_diffrn_reflns_limit_h_max        19 
_diffrn_reflns_limit_k_min        -11 
_diffrn_reflns_limit_k_max        12 
_diffrn_reflns_limit_l_min        -41 
_diffrn_reflns_limit_l_max        42 
_diffrn_reflns_theta_min          3.36 
_diffrn_reflns_theta_max          27.56 
_reflns_number_total              5333 
_reflns_number_gt                 2734 
_reflns_threshold_expression      >2sigma(I) 
 
_computing_data_collection        'CrysAlis CCD 1.171.13, Oxford Diffraction' 
_computing_cell_refinement        'CrysAlis RED 1.171.13, Oxford Diffraction' 
_computing_data_reduction         'CrysAlis RED 1.171.13, Oxford Diffraction' 
_computing_structure_solution     'SHELXS-97 (Sheldrick, 1990)' 
_computing_structure_refinement   'SHELXL-97 (Sheldrick, 1997)' 
_computing_molecular_graphics     'SHELXL-97' 
_computing_publication_material   'SHELXL-97' 
 
_refine_special_details 
; 
 Refinement of F^2^ against ALL reflections.  The weighted R-factor wR and 
 goodness of fit S are based on F^2^, conventional R-factors R are based 
 on F, with F set to zero for negative F^2^. The threshold expression of 
 F^2^ > 2sigma(F^2^) is used only for calculating R-factors(gt) etc. and is 
 not relevant to the choice of reflections for refinement.  R-factors based 
 on F^2^ are statistically about twice as large as those based on F, and R- 
 factors based on ALL data will be even larger. 
; 
 
_refine_ls_structure_factor_coef  Fsqd  
_refine_ls_matrix_type            full 
_refine_ls_weighting_scheme       calc  
_refine_ls_weighting_details 
 'calc w=1/[\s^2^(Fo^2^)+(0.0142P)^2^+0.0000P] where P=(Fo^2^+2Fc^2^)/3' 
_atom_sites_solution_primary      direct 
_atom_sites_solution_secondary    difmap 
_atom_sites_solution_hydrogens    geom 
_refine_ls_hydrogen_treatment     constr 
_refine_ls_extinction_method      none 
_refine_ls_extinction_coef        ? 
_refine_ls_number_reflns          5333 
_refine_ls_number_parameters      217 
_refine_ls_number_restraints      6 
_refine_ls_R_factor_all           0.1456 
_refine_ls_R_factor_gt            0.0528 
_refine_ls_wR_factor_ref          0.0863 
_refine_ls_wR_factor_gt           0.0685 
_refine_ls_goodness_of_fit_ref    0.848 
_refine_ls_restrained_S_all       0.849 
_refine_ls_shift/su_max           0.001 
_refine_ls_shift/su_mean          0.000 
 
loop_ 
 _atom_site_label 
 _atom_site_type_symbol 
 _atom_site_fract_x 
 _atom_site_fract_y 
 _atom_site_fract_z 
 _atom_site_U_iso_or_equiv 
 _atom_site_adp_type 
 _atom_site_occupancy 
 _atom_site_symmetry_multiplicity 
 _atom_site_calc_flag 
 _atom_site_refinement_flags 
 _atom_site_disorder_assembly 
 _atom_site_disorder_group 
W1 W 0.07922(2) 0.54642(4) 0.119228(10) 0.02242(12) Uani 1 1 d . . . 
Cl1 Cl -0.05596(15) 0.6769(2) 0.10082(7) 0.0372(6) Uani 1 1 d . . . 
N2 N 0.1249(4) 0.6322(7) 0.1644(2) 0.0318(19) Uani 1 1 d U . . 
N4 N 0.1033(4) 0.6117(7) 0.05911(18) 0.0192(16) Uani 1 1 d . . . 
N5 N 0.2272(4) 0.5211(7) 0.03385(18) 0.0191(16) Uani 1 1 d . . . 
N3 N 0.1950(4) 0.4710(7) 0.10136(17) 0.0209(16) Uani 1 1 d . . . 
N1 N 0.0308(5) 0.3877(7) 0.1288(2) 0.035(2) Uani 1 1 d . . . 
C41 C 0.1055(6) 0.8673(9) 0.0623(3) 0.040(3) Uani 1 1 d . . . 
H41A H 0.1637 0.8615 0.0821 0.059 Uiso 1 1 calc R . . 
H41B H 0.0582 0.8699 0.0779 0.059 Uiso 1 1 calc R . . 
H41C H 0.1029 0.9523 0.0453 0.059 Uiso 1 1 calc R . . 
C21 C 0.1254(12) 0.5890(16) 0.2387(3) 0.140(7) Uani 1 1 d . . . 
H21A H 0.0606 0.5756 0.2321 0.209 Uiso 1 1 calc R . . 
H21B H 0.1450 0.6248 0.2674 0.209 Uiso 1 1 calc R . . 
H21C H 0.1547 0.4995 0.2363 0.209 Uiso 1 1 calc R . . 
C52 C 0.1847(6) 0.5156(10) -0.0103(2) 0.037(3) Uani 1 1 d . . . 
H52A H 0.1212 0.5376 -0.0141 0.056 Uiso 1 1 calc R . . 
H52B H 0.1912 0.4217 -0.0211 0.056 Uiso 1 1 calc R . . 
H52C H 0.2127 0.5837 -0.0256 0.056 Uiso 1 1 calc R . . 
C42 C 0.0031(6) 0.7452(10) 0.0022(3) 0.031(2) Uani 1 1 d . . . 
H42A H -0.0035 0.6626 -0.0159 0.046 Uiso 1 1 calc R . . 
H42B H -0.0003 0.8295 -0.0151 0.046 Uiso 1 1 calc R . . 
H42C H -0.0449 0.7468 0.0175 0.046 Uiso 1 1 calc R . . 
C51 C 0.3216(5) 0.4907(9) 0.0448(2) 0.034(3) Uani 1 1 d . . . 
H51A H 0.3437 0.4975 0.0754 0.051 Uiso 1 1 calc R . . 
H51B H 0.3534 0.5580 0.0309 0.051 Uiso 1 1 calc R . . 
H51C H 0.3319 0.3961 0.0355 0.051 Uiso 1 1 calc R . . 
C30 C 0.2453(6) 0.3388(9) 0.1121(2) 0.022(2) Uani 1 1 d . . . 
H30A H 0.3058 0.3525 0.1062 0.026 Uiso 1 1 calc R . . 
C40 C 0.0926(5) 0.7403(8) 0.0335(3) 0.023(2) Uani 1 1 d . . . 
H40A H 0.1403 0.7415 0.0172 0.027 Uiso 1 1 calc R . . 
C1 C 0.1784(5) 0.5342(9) 0.0638(2) 0.0184(18) Uani 1 1 d . . . 
C10 C -0.0222(6) 0.2812(10) 0.1453(3) 0.031(2) Uani 1 1 d . . . 
C22 C 0.2507(8) 0.7092(18) 0.2194(4) 0.128(7) Uani 1 1 d . . . 
H22A H 0.2692 0.7763 0.2003 0.191 Uiso 1 1 calc R . . 
H22B H 0.2786 0.6186 0.2169 0.191 Uiso 1 1 calc R . . 
H22C H 0.2694 0.7428 0.2484 0.191 Uiso 1 1 calc R . . 
C11 C -0.0069(8) 0.2974(13) 0.1922(3) 0.070(4) Uani 1 1 d . . . 
H11A H 0.0561 0.2803 0.2052 0.105 Uiso 1 1 calc R . . 
H11B H -0.0439 0.2301 0.2032 0.105 Uiso 1 1 calc R . . 
H11C H -0.0228 0.3924 0.1989 0.105 Uiso 1 1 calc R . . 
C20 C 0.1500(7) 0.6935(10) 0.2077(3) 0.037(3) Uani 1 1 d . . . 
C12 C 0.0073(7) 0.1393(9) 0.1341(3) 0.054(3) Uani 1 1 d . . . 
H12A H 0.0700 0.1250 0.1482 0.081 Uiso 1 1 calc R . . 
H12B H 0.0006 0.1330 0.1036 0.081 Uiso 1 1 calc R . . 
H12C H -0.0294 0.0675 0.1433 0.081 Uiso 1 1 calc R . . 
C13 C -0.1219(6) 0.3076(10) 0.1237(3) 0.047(3) Uani 1 1 d . . . 
H13A H -0.1306 0.2966 0.0932 0.070 Uiso 1 1 calc R . . 
H13B H -0.1385 0.4025 0.1301 0.070 Uiso 1 1 calc R . . 
H13C H -0.1594 0.2403 0.1344 0.070 Uiso 1 1 calc R . . 
C32 C 0.2015(6) 0.2213(8) 0.0851(3) 0.030(2) Uani 1 1 d . . . 
H32A H 0.1948 0.2459 0.0554 0.045 Uiso 1 1 calc R . . 
H32B H 0.1426 0.2038 0.0907 0.045 Uiso 1 1 calc R . . 
H32C H 0.2383 0.1372 0.0915 0.045 Uiso 1 1 calc R . . 
C23 C 0.0966(12) 0.8172(15) 0.2095(4) 0.139(8) Uani 1 1 d . . . 
H23A H 0.1098 0.8876 0.1900 0.208 Uiso 1 1 calc R . . 
H23B H 0.1108 0.8549 0.2382 0.208 Uiso 1 1 calc R . . 
H23C H 0.0332 0.7927 0.2016 0.208 Uiso 1 1 calc R . . 
C31 C 0.2580(6) 0.3088(9) 0.1579(2) 0.037(3) Uani 1 1 d . . . 
H31A H 0.2869 0.3888 0.1742 0.055 Uiso 1 1 calc R . . 
H31B H 0.2955 0.2258 0.1651 0.055 Uiso 1 1 calc R . . 
H31C H 0.1998 0.2922 0.1645 0.055 Uiso 1 1 calc R . . 
 
loop_ 
 _atom_site_aniso_label 
 _atom_site_aniso_U_11 
 _atom_site_aniso_U_22 
 _atom_site_aniso_U_33 
 _atom_site_aniso_U_23 
 _atom_site_aniso_U_13 
 _atom_site_aniso_U_12 
W1 0.0218(2) 0.02368(19) 0.02224(18) -0.0013(2) 0.00596(13) 0.0064(2) 
Cl1 0.0266(14) 0.0476(16) 0.0405(14) 0.0071(12) 0.0144(11) 0.0198(12) 
N2 0.032(4) 0.039(4) 0.034(4) 0.013(4) 0.029(3) 0.023(4) 
N4 0.012(4) 0.023(4) 0.024(4) -0.001(3) 0.005(3) 0.010(3) 
N5 0.012(4) 0.024(4) 0.024(4) 0.001(3) 0.010(3) 0.006(3) 
N3 0.015(4) 0.030(4) 0.020(3) 0.005(4) 0.011(3) 0.015(4) 
N1 0.046(5) 0.022(4) 0.043(5) 0.010(4) 0.023(4) 0.018(4) 
C41 0.040(7) 0.025(6) 0.050(6) 0.004(5) 0.002(5) -0.004(5) 
C21 0.227(18) 0.161(16) 0.031(7) -0.025(9) 0.030(9) -0.102(14) 
C52 0.041(6) 0.046(7) 0.029(5) 0.002(4) 0.016(4) 0.003(5) 
C42 0.028(6) 0.032(6) 0.033(5) 0.009(4) 0.010(4) 0.016(4) 
C51 0.030(6) 0.038(7) 0.039(5) 0.015(4) 0.019(4) 0.016(4) 
C30 0.021(5) 0.021(5) 0.026(5) 0.006(4) 0.010(4) 0.018(4) 
C40 0.013(5) 0.023(5) 0.035(5) 0.006(4) 0.010(4) 0.004(4) 
C1 0.014(4) 0.021(5) 0.021(4) 0.004(4) 0.004(3) -0.001(4) 
C10 0.029(6) 0.034(6) 0.036(6) 0.010(5) 0.018(5) 0.006(5) 
C22 0.046(10) 0.26(2) 0.081(9) -0.092(11) 0.013(8) -0.039(11) 
C11 0.064(9) 0.102(10) 0.048(7) 0.017(7) 0.022(6) -0.019(7) 
C20 0.040(7) 0.044(7) 0.031(6) -0.012(5) 0.015(5) 0.005(5) 
C12 0.042(7) 0.030(6) 0.092(8) 0.029(6) 0.020(6) -0.007(6) 
C13 0.020(6) 0.051(7) 0.072(7) 0.018(6) 0.015(5) -0.004(5) 
C32 0.028(6) 0.023(5) 0.038(5) 0.009(5) 0.005(5) 0.003(5) 
C23 0.205(18) 0.119(13) 0.074(9) -0.060(9) -0.007(10) 0.104(13) 
C31 0.036(6) 0.040(6) 0.033(5) 0.011(5) 0.005(5) 0.017(5) 
 
_geom_special_details 
; 
 All esds (except the esd in the dihedral angle between two l.s. planes) 
 are estimated using the full covariance matrix.  The cell esds are taken 
 into account individually in the estimation of esds in distances, angles 
 and torsion angles; correlations between esds in cell parameters are only 
 used when they are defined by crystal symmetry.  An approximate (isotropic) 
 treatment of cell esds is used for estimating esds involving l.s. planes. 
; 
 
loop_ 
 _geom_bond_atom_site_label_1 
 _geom_bond_atom_site_label_2 
 _geom_bond_distance 
 _geom_bond_site_symmetry_2 
 _geom_bond_publ_flag 
W1 N2 1.693(7) . ? 
W1 N1 1.753(7) . ? 
W1 N3 2.125(6) . ? 
W1 N4 2.169(6) . ? 
W1 Cl1 2.385(2) . ? 
N2 C20 1.500(10) . ? 
N4 C1 1.354(9) . ? 
N4 C40 1.476(9) . ? 
N5 C1 1.366(8) . ? 
N5 C52 1.440(8) . ? 
N5 C51 1.446(9) . ? 
N3 C1 1.339(8) . ? 
N3 C30 1.484(9) . ? 
N1 C10 1.482(11) . ? 
C41 C40 1.522(11) . ? 
C21 C20 1.529(14) . ? 
C42 C40 1.517(11) . ? 
C30 C32 1.492(11) . ? 
C30 C31 1.492(10) . ? 
C10 C12 1.504(12) . ? 
C10 C11 1.504(12) . ? 
C10 C13 1.556(12) . ? 
C22 C20 1.517(14) . ? 
C20 C23 1.451(14) . ? 
 
loop_ 
 _geom_angle_atom_site_label_1 
 _geom_angle_atom_site_label_2 
 _geom_angle_atom_site_label_3 
 _geom_angle 
 _geom_angle_site_symmetry_1 
 _geom_angle_site_symmetry_3 
 _geom_angle_publ_flag 
N2 W1 N1 112.1(3) . . ? 
N2 W1 N3 101.3(3) . . ? 
N1 W1 N3 99.9(3) . . ? 
N2 W1 N4 121.6(3) . . ? 
N1 W1 N4 125.3(3) . . ? 
N3 W1 N4 61.6(2) . . ? 
N2 W1 Cl1 97.5(2) . . ? 
N1 W1 Cl1 96.7(2) . . ? 
N3 W1 Cl1 148.01(17) . . ? 
N4 W1 Cl1 86.54(17) . . ? 
C20 N2 W1 168.0(6) . . ? 
C1 N4 C40 120.2(6) . . ? 
C1 N4 W1 93.3(4) . . ? 
C40 N4 W1 137.1(5) . . ? 
C1 N5 C52 121.2(6) . . ? 
C1 N5 C51 121.9(6) . . ? 
C52 N5 C51 116.3(6) . . ? 
C1 N3 C30 125.6(6) . . ? 
C1 N3 W1 95.7(5) . . ? 
C30 N3 W1 130.7(5) . . ? 
C10 N1 W1 162.6(6) . . ? 
N3 C30 C32 111.3(6) . . ? 
N3 C30 C31 110.0(6) . . ? 
C32 C30 C31 112.6(7) . . ? 
N4 C40 C41 109.7(6) . . ? 
N4 C40 C42 112.0(7) . . ? 
C41 C40 C42 111.1(7) . . ? 
N3 C1 N4 109.3(6) . . ? 
N3 C1 N5 126.2(7) . . ? 
N4 C1 N5 124.4(7) . . ? 
N1 C10 C12 108.3(7) . . ? 
N1 C10 C11 109.0(8) . . ? 
C12 C10 C11 110.7(8) . . ? 
N1 C10 C13 107.0(7) . . ? 
C12 C10 C13 111.1(8) . . ? 
C11 C10 C13 110.7(8) . . ? 
C23 C20 N2 109.3(8) . . ? 
C23 C20 C22 117.7(12) . . ? 
N2 C20 C22 107.8(8) . . ? 
C23 C20 C21 106.3(12) . . ? 
N2 C20 C21 108.4(8) . . ? 
C22 C20 C21 107.0(11) . . ? 
 
loop_ 
 _geom_torsion_atom_site_label_1 
 _geom_torsion_atom_site_label_2 
 _geom_torsion_atom_site_label_3 
 _geom_torsion_atom_site_label_4 
 _geom_torsion 
 _geom_torsion_site_symmetry_1 
 _geom_torsion_site_symmetry_2 
 _geom_torsion_site_symmetry_3 
 _geom_torsion_site_symmetry_4 
 _geom_torsion_publ_flag 
N1 W1 N2 C20 -31(3) . . . . ? 
N3 W1 N2 C20 -136(3) . . . . ? 
N4 W1 N2 C20 160(3) . . . . ? 
Cl1 W1 N2 C20 70(3) . . . . ? 
N2 W1 N4 C1 87.5(5) . . . . ? 
N1 W1 N4 C1 -80.0(5) . . . . ? 
N3 W1 N4 C1 1.7(4) . . . . ? 
Cl1 W1 N4 C1 -175.8(4) . . . . ? 
N2 W1 N4 C40 -55.9(8) . . . . ? 
N1 W1 N4 C40 136.6(7) . . . . ? 
N3 W1 N4 C40 -141.7(8) . . . . ? 
Cl1 W1 N4 C40 40.8(7) . . . . ? 
N2 W1 N3 C1 -121.7(5) . . . . ? 
N1 W1 N3 C1 123.3(5) . . . . ? 
N4 W1 N3 C1 -1.7(4) . . . . ? 
Cl1 W1 N3 C1 3.1(7) . . . . ? 
N2 W1 N3 C30 89.3(7) . . . . ? 
N1 W1 N3 C30 -25.7(7) . . . . ? 
N4 W1 N3 C30 -150.7(7) . . . . ? 
Cl1 W1 N3 C30 -145.9(5) . . . . ? 
N2 W1 N1 C10 48(2) . . . . ? 
N3 W1 N1 C10 155(2) . . . . ? 
N4 W1 N1 C10 -143.2(19) . . . . ? 
Cl1 W1 N1 C10 -53(2) . . . . ? 
C1 N3 C30 C32 -60.3(10) . . . . ? 
W1 N3 C30 C32 80.7(8) . . . . ? 
C1 N3 C30 C31 174.3(7) . . . . ? 
W1 N3 C30 C31 -44.8(10) . . . . ? 
C1 N4 C40 C41 -105.1(8) . . . . ? 
W1 N4 C40 C41 31.4(10) . . . . ? 
C1 N4 C40 C42 131.1(7) . . . . ? 
W1 N4 C40 C42 -92.5(8) . . . . ? 
C30 N3 C1 N4 153.8(7) . . . . ? 
W1 N3 C1 N4 2.5(7) . . . . ? 
C30 N3 C1 N5 -24.5(12) . . . . ? 
W1 N3 C1 N5 -175.8(7) . . . . ? 
C40 N4 C1 N3 149.5(7) . . . . ? 
W1 N4 C1 N3 -2.5(6) . . . . ? 
C40 N4 C1 N5 -32.2(11) . . . . ? 
W1 N4 C1 N5 175.9(7) . . . . ? 
C52 N5 C1 N3 141.6(8) . . . . ? 
C51 N5 C1 N3 -28.7(12) . . . . ? 
C52 N5 C1 N4 -36.4(12) . . . . ? 
C51 N5 C1 N4 153.2(7) . . . . ? 
W1 N1 C10 C12 -167.3(17) . . . . ? 
W1 N1 C10 C11 -47(2) . . . . ? 
W1 N1 C10 C13 73(2) . . . . ? 
W1 N2 C20 C23 -84(3) . . . . ? 
W1 N2 C20 C22 147(3) . . . . ? 
W1 N2 C20 C21 31(3) . . . . ? 
 
_diffrn_measured_fraction_theta_max    0.983 
_diffrn_reflns_theta_full              27.56 
_diffrn_measured_fraction_theta_full   0.983 
_refine_diff_density_max    1.900 
_refine_diff_density_min   -2.424 
_refine_diff_density_rms    0.178 
